# Supplementary material
Source: PubMed Central journal article supplement (PMC3246193)

## SUPPLEMENTAL MATERIAL

**Table S1.** Raw Ct values (Mean±SEM) for each miR examined in this study.

| <b>Small RNA Control</b> | <b>Control</b> | <b>Small TAAs</b> | <b>Medium TAAs</b> | <b>Large TAAs</b> |
|--------------------------|----------------|-------------------|--------------------|-------------------|
| <i>snRNAU6</i>           | 16.2±0.6       | 16.1±0.9          | 18.8±0.9           | 16.9±1.0          |
| <i>miR-1</i>             | 24.0±0.7       | 25.1±1.7          | 28.8±1.8           | 29.6±1.7          |
| <i>miR-21</i>            | 18.6±0.9       | 18.7±1.5          | 21.8±1.6           | 21.8±1.7          |
| <i>miR-29a</i>           | 15.2±0.4       | 17.8±1.7          | 21.8±1.7           | 21.9±1.6          |
| <i>miR-133a</i>          | 18.8±0.4       | 20.5±1.3          | 22.8±1.4           | 23.2±1.2          |
| <i>miR-486-5p</i>        | 21.7±0.5       | 23.6±1.3          | 24.8±1.7           | 24.7±1.0          |
| <i>miR-760</i>           | 24.1±0.3       | 24.5±0.5          | 26.0±0.7           | 26.6±0.5          |

## SUPPLEMENTAL FIGURE LEGENDS

**Figure S1.** Alterations in miR expression in clinical TAA specimens as compared to normal aorta. Representative plots of raw cycling data depicting the difference in  $\Delta Ct$  values on the x-axis and the change in relative fluorescence values on the y-axis, between normal aorta (solid line) and TAA aorta (dashed line) from quantitative real-time PCR results.

**Figure S2.** Functional characteristics of the 37 differentially expressed miRs between Aneurysm (n=4) and Normal (n=4) aorta. The functions for the 37 differentially expressed miRs were estimated based on published manuscripts reported in PubMed.; 27% target proliferation pathways, 16% target growth arrest pathways, 8% target ECM structure/function, 5% (each) target apoptosis, migration, and angiogenesis, 3% (each) target drug resistance, immune response, autophagy, and cell adhesion pathways, and 22% to date have no reported function.

**Figure S3.** Transduction of human primary aortic vascular smooth muscle cells with a non-targeting mismatch control virus. **A.** Cells were exposed to a non-targeting mismatch control lentivirus, containing a bicistronic copy of green fluorescent protein (GFP), or to the transduction reagent alone. Five days post-transduction the cells were harvested and cell homogenates were examined by gelatin zymography and immunoblotting. The results demonstrated no change in latent (72 kDa) or active (64 kDa) MMP-2 with lentiviral transduction of a non-targeting sequence (*top*).

Immunoblotting for GFP (*middle*) and  $\beta$ -actin (*bottom*) confirmed lentiviral transduction of the mismatch control (GFP), and equal lane loading ( $\beta$ -actin) respectively (representative blots shown, n=3). **B.** Quantitation of total MMP-2 protein abundance following viral transduction. The results demonstrated that overexpression of a non-targeting sequence had no effect on total MMP-2 protein levels (n=3; p=0.6047).

**Figure S1.**

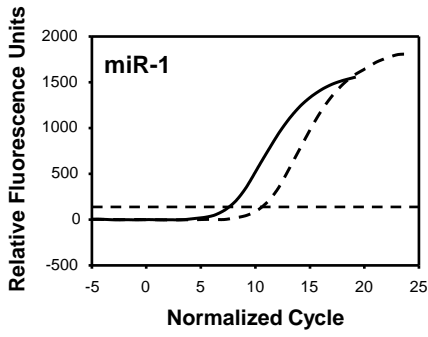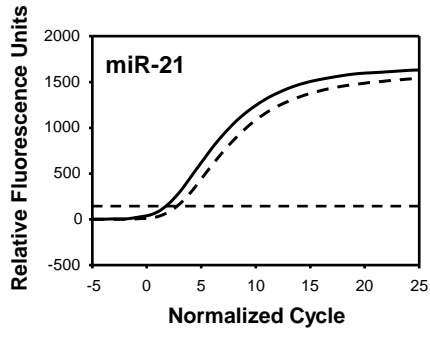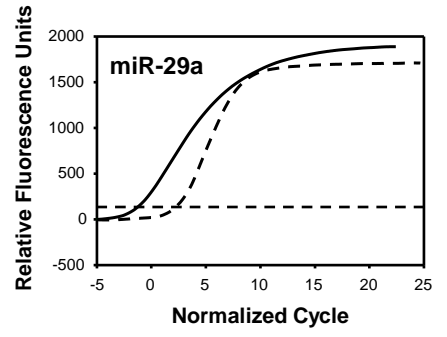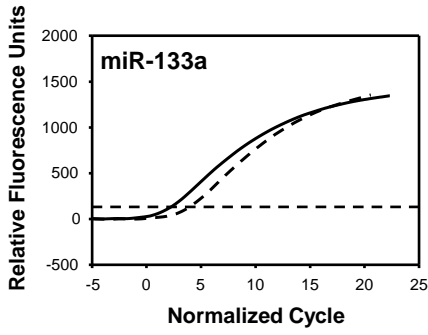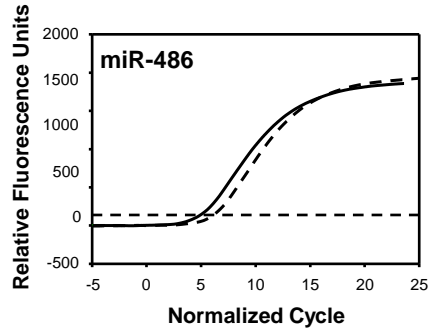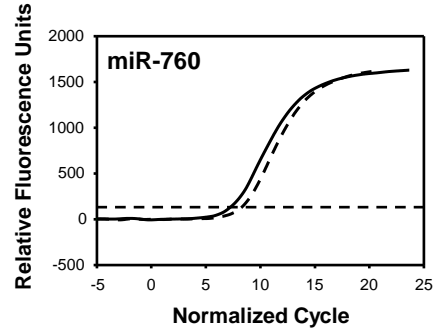

**Figure S2.**

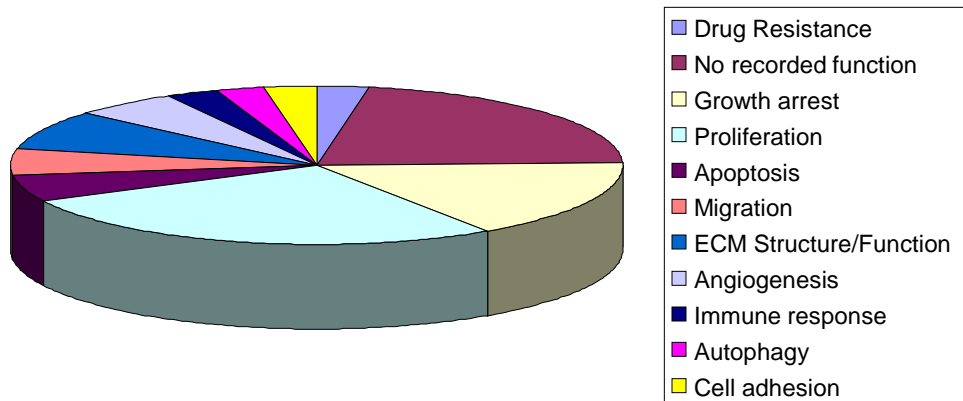

Figure S3.

A.

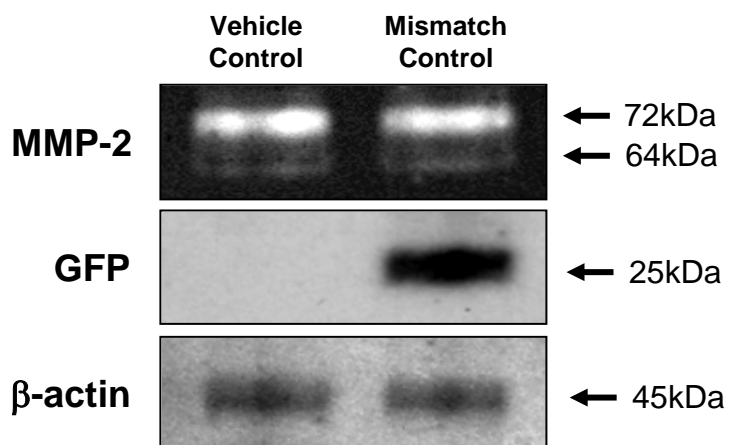

B.

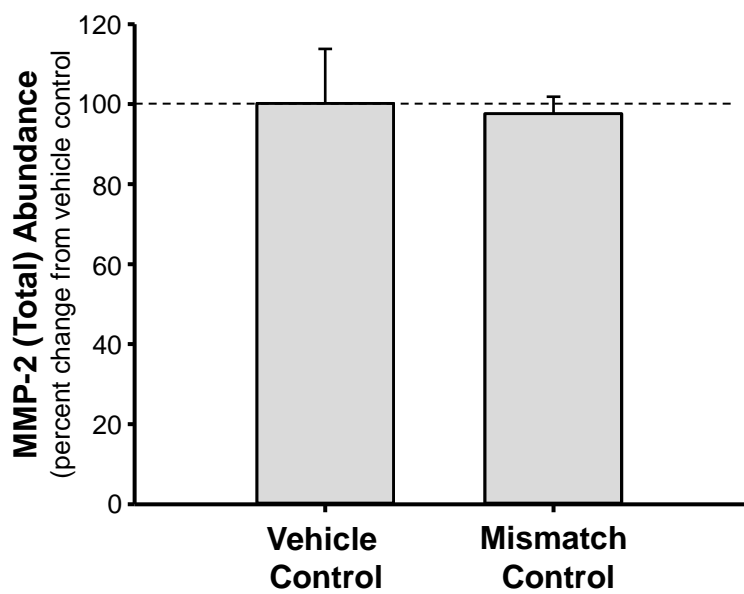

Supplement: NIHMS339733-supplement-1.pdf [file NIHMS339733-supplement-1.pdf]
